# Supplementary material for: Kinetics of neurodegeneration based on a risk-related biomarker in animal model of glaucoma
Source: PubMed Central journal article supplement (PMC3599096; doi:10.1186/1750-1326-8-4), 2013-01-18
Supplement: 1750-1326-8-4-S1.pdf [file 1750-1326-8-4-S1.pdf]

**Table S1.** Animals with monocular glaucomatous neurodegeneration

| Animal ID | Duration of observation (days) | IOP (mmHg) |      |      |         | Ophthalmoscopic findings |      |             |                     |
|-----------|--------------------------------|------------|------|------|---------|--------------------------|------|-------------|---------------------|
|           |                                | Baseline   |      | Mean | Maximal | Baseline C/D             |      | Maximal C/D | Glaucomatous stage* |
|           |                                | R          | L    | L    | L       | R                        | L    | L           |                     |
| #1        | 65                             | 22.6       | 24.3 | 40.2 | 52.7    | 0.15                     | 0.19 | 0.20        | Mild                |
| #2        | 33                             | 21.7       | 23.4 | 61.3 | 72.0    | 0.26                     | 0.25 | 0.40        | Moderate            |
| #3        | 78                             | 21.0       | 20.3 | 60.2 | 73.3    | 0.22                     | 0.17 | 0.64        | Advanced            |
| #4        | 106                            | 24.3       | 24.7 | 62.1 | 70.7    | 0.18                     | 0.19 | 0.56        | Advanced            |
| #5        | 168                            | 24.8       | 22.4 | 50.8 | 60.0    | 0.23                     | 0.23 | 0.77        | Advanced            |

IOP, intraocular pressure; C/D, cup to disc area ratio; L, left; R, right. \*Glaucomatous stage was diagnosed by an experienced observer based on ophthalmoscopic findings.
